# Supplementary material for: Intratumoral heterogeneity of surrogate molecular subtypes in urothelial carcinoma in situ of the urinary bladder: implications for prognostic stratification of high-risk non-muscle-invasive bladder cancer
Source: Virchows Arch. 2021 Mar 1;479(2):325–35. doi: 10.1007/s00428-021-03054-0 (PMC8364543; doi:10.1007/s00428-021-03054-0)
Supplement: Supplementary file 1 — Protein expression of luminal and basal markers as well as of p53 in CIS biopsies from HR NMIBC patients of two independent cohorts (PDF 45 kb). [file 428_2021_3054_MOESM1_ESM.pdf]

# **Intratumoral heterogeneity of surrogate molecular subtypes in urothelial carcinoma in situ of the urinary bladder: implications for prognostic stratification of high-risk non-muscle-invasive bladder cancer**

Stefan Garczyk, Felix Bischoff, Ursula Schneider, Reinhard Golz, Friedrich-Carl von Rundstedt, Ruth Knüchel and Stephan Degener

## Corresponding author:

Stefan Garczyk, PhD, Institute of Pathology, University Hospital RWTH Aachen, Pauwelsstr. 30, 52074 Aachen, Germany, Email: [sgarczyk@ukaachen.de](mailto:sgarczyk@ukaachen.de)

**Online Resource 1** Protein expression of luminal and basal markers as well as of p53 in CIS biopsies from HR NMIBC patients of two independent cohorts [14]

| Current CIS cohort |     |         |          | CIS Aachen/Munich cohort<br>n= 156 (100%)<br>samples |       |          |
|--------------------|-----|---------|----------|------------------------------------------------------|-------|----------|
|                    |     |         | median   |                                                      |       | median   |
| <b>KRT20</b>       |     |         |          |                                                      |       |          |
| positive           | 129 | (57%)   | positive | 132                                                  | (85%) | positive |
| negative           | 98  | (43%)   |          | 24                                                   | (15%) |          |
| <b>ERBB2</b>       |     |         |          |                                                      |       |          |
| 0-1                | 31  | (14%)   | 3        | 55                                                   | (35%) | 2        |
| 2                  | 42  | (19%)   |          | 51                                                   | (33%) |          |
| 3                  | 150 | (67%)   |          | 50                                                   | (32%) |          |
| <b>GATA3</b>       |     |         |          |                                                      |       |          |
| 0-2                | 1   | (0.4%)  | 12       | 5                                                    | (3%)  | 12       |
| 3-12               | 225 | (99.6%) |          | 151                                                  | (97%) |          |
| <b>KRT5/6</b>      |     |         |          |                                                      |       |          |
| positive           | 7   | (3%)    | negative | 3                                                    | (2%)  | negative |
| negative           | 206 | (97%)   |          | 153                                                  | (98%) |          |
| <b>KRT14</b>       |     |         |          |                                                      |       |          |
| positive           | 0   | (0%)    | negative | 2                                                    | (1%)  | negative |
| negative           | 231 | (100%)  |          | 154                                                  | (99%) |          |
| <b>p53</b>         |     |         |          |                                                      |       |          |
| aberrant           | 150 | (68%)   | -        | 99                                                   | (63%) | -        |
| non-aberrant       | 72  | (32%)   |          | 57                                                   | (37%) |          |

For KRT20, KRT5/6, and KRT14, percentage of positive cells was determined and biopsy samples were considered positive if > 50% of cells expressed the marker. GATA3 expression was scored using the Remmele score, whereas ERBB2 expression was scored with the Dako score. Note: numbers of analyzed samples for each single marker differ due to availability of sample material.
